# Supplementary material for: Alternate dab-aeg PNAs: synthesis, nucleic acid binding studies and biological activity
Source: Royal Society of Chemistry journal article supplement (doi:10.1039/b910278g), 2009-09-04

## **ELECTRONIC SUPPLEMENTARY INFORMATION (ESI)**

### **Alternate *dab-aeg*PNAs: synthesis, nucleic acid binding studies and biological activity**

Giovanni N. Roviello,<sup>a</sup> Domenica Musumeci,<sup>\*a</sup> Andrea De Cristofaro,<sup>a</sup> Domenica Capasso,<sup>b</sup> Sonia Di Gaetano,<sup>a</sup> Enrico M. Bucci,<sup>a</sup> and Carlo Pedone<sup>b</sup>

\* *To whom correspondence should be addressed: [domymusu@alice.it](mailto:domymusu@alice.it); Tel: +39-(0)81-2534585; Fax: +39-(0)81-2534574.*

<sup>a</sup> *Istituto di Biostrutture e Bioimmagini – CNR via Mezzocannone 16, I-80134 Napoli, Italy;*

<sup>b</sup> *Department of Biological Sciences, “Federico II” University of Naples, via Mezzocannone 16, I-80134 Napoli, Italy.*

Supplementary Scheme S1. Synthesis of the alternate *dab*-*ae*gPNA  $t_{12}$  (2).

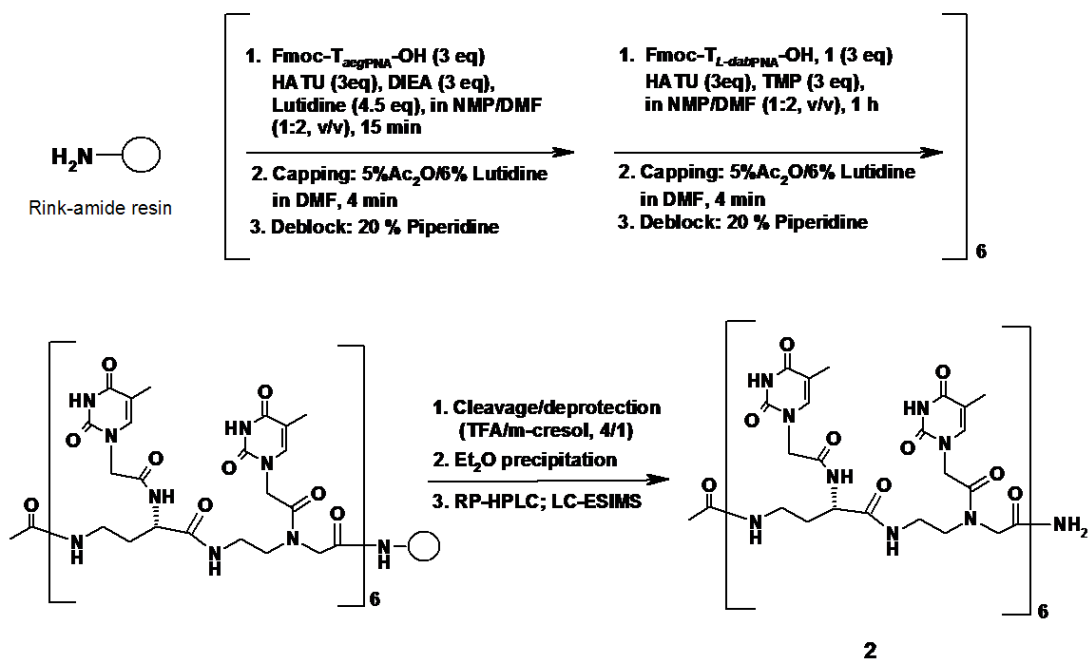

**Supplementary Figure S1.** LC-ESIMS of the *dab-aeg*PNA t<sub>12</sub> (2).

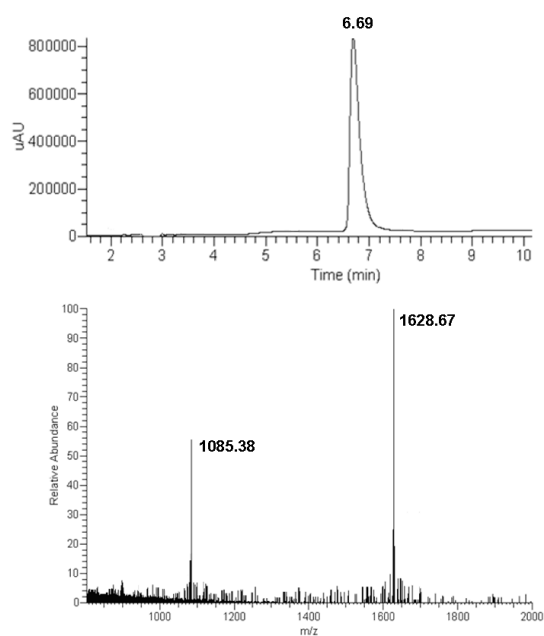

Supplement: b910278g.pdf [file b910278g.pdf]
